# Supplementary material
Source: PubMed Central journal article supplement (PMC6931393)
Supplement: NIHMS1062805-supplement-SI.pdf [file NIHMS1062805-supplement-SI.pdf]

# Supporting Information

## Carbon chain decomposition of short chain chlorinated paraffins (SCCPs)

### mediated by pumpkin and soybean seedlings

Yanlin Li<sup>†,‡,§</sup>, Xingwang Hou<sup>†,||</sup>, Weifang Chen<sup>†,||</sup>, Jiyan Liu<sup>\*,†,||</sup>, Qunfang Zhou<sup>†,||</sup>, Jerald L. Schnoor<sup>‡</sup>, and Guibin Jiang<sup>†,||</sup>

<sup>†</sup>State Key Laboratory of Environmental Chemistry and Ecotoxicology, Research Center for Eco-Environmental Sciences, Chinese Academy of Sciences, P.O. Box 2871, Beijing, 100085, China

<sup>‡</sup>Department of Civil and Environmental Engineering, University of Iowa, Iowa City, Iowa, USA

<sup>§</sup>School of Earth and Space Sciences, University of Science and Technology of China, Hefei, 230026, China

<sup>||</sup>College of Resources and Environment, University of Chinese Academy of Sciences, Beijing, 100049, China

\*Corresponding author

Tel: +86 10 62849334

Fax: +86 10 62849339

E-mail: [liujy@rcees.ac.cn](mailto:liujy@rcees.ac.cn)

## Summary of the Supporting Information

**Total Pages: 23; total text: 4; total tables: 6; total figures: 4**

**List of contents:**

**Text S1:** Chemicals and regents.

**Text S2:** Extraction and clean up.

**Text S3:** Instrumentation.

**Text S4:** Laboratory blanks/background contamination.

**Table S1:** Information on commercial standards of individual SCCP congeners.

**Table S2:** Water solubility and method detection limits (MDLs) of various parent individual SCCP congeners.

**Table S3:** List of target chlorinated paraffins (CPs) and their SIM ions.

**Table S4:** SCCPs of plant background (plants before exposure).

**Table S5:** Concentrations of daughter SCCPs in shoots, stems and roots of exposed pumpkins and soybeans.

**Table S6:** Concentrations of daughter SCCPs in shoots, stems and roots of planted blank control of pumpkin (PBCP) and soybean (PBCS).

**Figure S1** Schematic of the hydroponic exposure experiments and sampling.

**Figure S2** Concentrations of parent SCCPs in the solutions (A), roots (B), stems (C), and shoots (D) when pumpkin plants were exposed to SCCPs over time.

**Figure S3** Concentrations of daughter SCCP congeners in exposure groups (A-D) and planted blank controls (E-H) of pumpkin seedlings over time.

**Figure S4** Mass percent of individual parent SCCPs (A) and concentrations of total daughter

45 SCCPs (B) in different compartments of soybeans after 10 days exposure.

46 **References**

47

48

49

50

51

52

53

54

55

56

57

58

59

60

61

62

63

64

65

66

67 **Text S1: Chemicals and reagents**

68 Florisil (60-100 mesh, Sigma–Aldrich, St. Louis, USA), silica gel (0.063-0.100 mm, Merk,  
69 Darmstadt, Germany) and anhydrous sodium sulfate ( $\text{Na}_2\text{SO}_4$ ) were heated at 140 °C for 7 h,  
70 550 °C for 12 h, and 660 °C for 6 h, respectively. Acid silica gel was a mixture of activated  
71 silica and concentrated  $\text{H}_2\text{SO}_4$ . Then, all of these were stored in a sealed desiccator. Pesticide  
72 grade hexane, dichloromethane, acetone and cyclohexane were purchased from J.T. Baker  
73 (Phillipsburg, NJ, USA). Ultrapure water ( $18.3 \text{ M}\Omega \times \text{cm}$ ) was obtained from a Milli-Q  
74 purification system (Millipore, Billerica, USA). All other chemicals and reagents were  
75 analytical grade or better.

76

77

78

79

80

81

82

83

84

85

86

87

88

89 **Text S2: Extraction and clean up**

90 The method for extraction and cleanup was the same as that in our previous research,<sup>1</sup> which  
91 was modified from the method developed by Zeng et al.<sup>2</sup> In brief, all samples were added with  
92 a surrogate standard (1 ng <sup>13</sup>C<sub>10</sub>-*trans*-chlordanane) before extraction. Hydroponic solutions were  
93 extracted immediately with 15 mL of dichloromethane for three times consecutively after  
94 sampling. The volume of solutions of exposure groups and planted blank controls, and  
95 unplanted chemical controls was 22-32 mL, and 40 mL, respectively. The combined organic  
96 phase went through an anhydrous sodium sulfate (Na<sub>2</sub>SO<sub>4</sub>) column (5 g) to remove the  
97 remaining trace water and then concentrated to 2 mL. Ground-up plant samples were extracted  
98 by a mixture of n-hexane and dichloromethane (1:1, v/v) using an accelerated solvent extractor  
99 (ASE). The ASE parameters were set at a temperature of 100 °C, pressure of 1500 psi, thermal  
100 equilibration for 5 min, static extraction for three cycles (7 min per cycle), and a gaseous  
101 nitrogen purge for 100 s. The extract was shaken with the acid silica gel (44%, w/w), then passed  
102 through an anhydrous sodium sulfate column (5 g) and finally concentrated to 2 mL for further  
103 clean up.

104

105 All the extracts were cleaned-up by multilayer columns which were pre-cleaned by 50 mL of  
106 hexane. Columns contained 3 g florisil, 2 g activated silica gel, 5 g acid silica gel (30%, w/w),  
107 and 4 g anhydrous sodium sulfate from the bottom to the top. After impurities were rinsed by  
108 35 mL of hexane, elution was carried out by adding 100 mL of dichloromethane/hexane (1:1,  
109 v/v). The eluent was dried, re-dissolved in 200 µL of cyclohexane and added with 10 ng  
110 injection standard for instrumental analysis.

111 **Text S3 Instrumentation**

112 The GC was equipped with a 7683B series injector and DB-5MSUI capillary column (30  
113 m×0.25 mm×0.25 μm; Agilent, CA). Helium (≥ 99.999%) and methane (≥ 99.999%) were the  
114 carrier and moderating gases at constant flows of 2.0 and 0.40 mL/min, respectively. The  
115 column temperature was initially controlled at 100 °C, held for 1 min; then increased by 30  
116 °C/min to 160 °C, held for 5 min; and finally increased to 300 °C at 30 °C /min and held for 12  
117 min. The pulsed splitless mode injector, ion source and transfer line were set at 280 °C, 200 °C  
118 and 280 °C, respectively.

119

120

121

122

123

124

125

126

127

128

129

130

131

132

133 **Text S4: Laboratory blanks/background contamination**

134 Plants were grown in the cultivation chamber free of parent SCCPs exposure prior to the actual  
135 exposure experiment. All results subtracted the corresponding SCCP congener concentrations  
136 of the plant background. The calculation equation is shown as follow:

137  $C = C_{\text{detected}} - C_{\text{plantbackground}}$

138 in which  $C$  is the corrected concentration of SCCPs,  $C_{\text{detected}}$  is the detected concentrations of  
139 SCCPs, and  $C_{\text{plantbackground}}$  is the concentrations of the SCCPs in the plant background. No CPs  
140 were detected in the cultivation solution of the plant background.

141

142

143

144

145

146

147

148

149

150

151

152

153

154 **Table S1 Information on commercial standards of individual SCCP congeners.**

| Congener<br>cod/CAS NO. | Formula                                         | Name                                | Purity<br>(%)     | Concentration<br>(µg/ mL) | Source         |
|-------------------------|-------------------------------------------------|-------------------------------------|-------------------|---------------------------|----------------|
| CP-3                    | C <sub>10</sub> H <sub>17</sub> Cl <sub>5</sub> | 1,2,5,6,9-pentachlorodecane         | 99.1 <sup>a</sup> | 10                        | E <sup>b</sup> |
| CP-4                    | C <sub>10</sub> H <sub>16</sub> Cl <sub>6</sub> | 1,2,5,6,9,10-hexachlorodecane       | 99.9              | 10                        | E              |
| CP-6                    | C <sub>10</sub> H <sub>16</sub> Cl <sub>6</sub> | 1,2,4,5,9,10-hexachlorodecane       | 99.9              | 10                        | E              |
| CP-7                    | C <sub>10</sub> H <sub>15</sub> Cl <sub>7</sub> | 1,2,4,5,6,9,10-heptachlorodecane    | 99.9              | 10                        | E              |
| CP-8                    | C <sub>10</sub> H <sub>15</sub> Cl <sub>7</sub> | 1,2,5,5,6,9,10-heptachlorodecane    | 94.0              | 10                        | E              |
| 601523-23-3             | C <sub>10</sub> H <sub>14</sub> Cl <sub>8</sub> | 1,1,1,3,8,10,10,10-octachlorodecane | 96.4              | 100                       | C <sup>c</sup> |
| 601523-28-8             | C <sub>11</sub> H <sub>18</sub> Cl <sub>6</sub> | 1,1,1,3,10,11-hexachloroundecane    | 90.4              | 100                       | C              |
| 865306-23-6             | C <sub>13</sub> H <sub>22</sub> Cl <sub>6</sub> | 1,1,1,3,12,13-hexachlorotridecane   | 95.0              | 100                       | C              |
| 865306-21-4             | C <sub>9</sub> H <sub>14</sub> Cl <sub>6</sub>  | 1,1,1,3,8,9- hexachlorononane       | 98.7              | 1000                      | C              |

155 <sup>a</sup> The concentrations of decane standard solutions from Ehrenstorfer GmbH have been  
 156 adjusted according to the purity of the compounds as indicated. <sup>b</sup> Dr. Ehrensforfer GmbH,  
 157 Germany. <sup>c</sup> Chiron, Norway.

158

159

160

161

162

163

164



165 **Table S2 Water solubility and method detection limits (MDLs) of various parent**  
 166 **individual SCCP congeners.**

| Congeners                 | Water solubility <sup>a</sup><br>(ng/mL) | MDLs          |                  |
|---------------------------|------------------------------------------|---------------|------------------|
|                           |                                          | Plants (ng/g) | Solution (ng/mL) |
| 1,2,5,6,9,10-HexCD        | 54.0                                     | 15.8 ± 6.3    | 0.27 ± 0.05      |
| 1,1,1,3,8,10,10,10-OctaCD | 1.55                                     | 34.7 ± 5.3    | 0.32 ± 0.07      |
| 1,1,1,3,10,11-HexCU       | 4.80                                     | 213 ± 15      | 0.41 ± 0.03      |
| 1,1,1,3,12,13-HexCT       | 0.44                                     | 16.1 ± 7.2    | 0.25 ± 0.08      |

167 <sup>a</sup> Calculated value using the Estimation Programs Interface (EPI) Suite software.

168

169

170

171

172

173

174

175

176

177

178

179

180 **Table S3 List of target chlorinated paraffins (CPs) and their SIM ions.**

| Short chain CPs                  |                                      |                                      | Medium chain CPs                 |                                      |                                      |
|----------------------------------|--------------------------------------|--------------------------------------|----------------------------------|--------------------------------------|--------------------------------------|
| CP congener                      | Selected ions monitored              |                                      | CP congener                      | Selected ions monitored              |                                      |
|                                  | m/z <sub>1</sub> [M-Cl] <sup>-</sup> | m/z <sub>2</sub> [M-Cl] <sup>-</sup> |                                  | m/z <sub>1</sub> [M-Cl] <sup>-</sup> | m/z <sub>2</sub> [M-Cl] <sup>-</sup> |
| C <sub>9</sub> Cl <sub>5</sub>   | 264.9                                | 262.9                                | C <sub>14</sub> Cl <sub>5</sub>  | 335.1                                | 333.1                                |
| C <sub>9</sub> Cl <sub>6</sub>   | 298.9                                | 300.9                                | C <sub>14</sub> Cl <sub>6</sub>  | 369.0                                | 371.0                                |
| C <sub>9</sub> Cl <sub>7</sub>   | 332.9                                | 334.9                                | C <sub>14</sub> Cl <sub>7</sub>  | 403.0                                | 405.0                                |
| C <sub>9</sub> Cl <sub>8</sub>   | 366.9                                | 368.9                                | C <sub>14</sub> Cl <sub>8</sub>  | 437.0                                | 438.9                                |
| C <sub>9</sub> Cl <sub>9</sub>   | 402.8                                | 400.8                                | C <sub>14</sub> Cl <sub>9</sub>  | 472.9                                | 470.9                                |
| C <sub>9</sub> Cl <sub>10</sub>  | 436.8                                | 434.8                                | C <sub>14</sub> Cl <sub>10</sub> | 506.9                                | 504.9                                |
| C <sub>10</sub> Cl <sub>5</sub>  | 279.0                                | 277.0                                | C <sub>15</sub> Cl <sub>5</sub>  | 349.1                                | 347.1                                |
| C <sub>10</sub> Cl <sub>6</sub>  | 313.0                                | 315.0                                | C <sub>15</sub> Cl <sub>6</sub>  | 383.0                                | 385.0                                |
| C <sub>10</sub> Cl <sub>7</sub>  | 346.9                                | 348.9                                | C <sub>15</sub> Cl <sub>7</sub>  | 417.0                                | 419.0                                |
| C <sub>10</sub> Cl <sub>8</sub>  | 380.9                                | 382.9                                | C <sub>15</sub> Cl <sub>8</sub>  | 451.0                                | 453.0                                |
| C <sub>10</sub> Cl <sub>9</sub>  | 416.8                                | 414.8                                | C <sub>15</sub> Cl <sub>9</sub>  | 486.9                                | 484.9                                |
| C <sub>10</sub> Cl <sub>10</sub> | 450.8                                | 448.8                                | C <sub>15</sub> Cl <sub>10</sub> | 520.9                                | 518.9                                |
| C <sub>11</sub> Cl <sub>5</sub>  | 293.0                                | 291.0                                | C <sub>16</sub> Cl <sub>5</sub>  | 363.1                                | 361.1                                |
| C <sub>11</sub> Cl <sub>6</sub>  | 327.0                                | 329.0                                | C <sub>16</sub> Cl <sub>6</sub>  | 397.1                                | 399.1                                |
| C <sub>11</sub> Cl <sub>7</sub>  | 360.9                                | 362.9                                | C <sub>16</sub> Cl <sub>7</sub>  | 431.0                                | 433.0                                |
| C <sub>11</sub> Cl <sub>8</sub>  | 394.9                                | 396.9                                | C <sub>16</sub> Cl <sub>8</sub>  | 465.0                                | 467.0                                |
| C <sub>11</sub> Cl <sub>9</sub>  | 430.9                                | 428.9                                | C <sub>16</sub> Cl <sub>9</sub>  | 500.9                                | 498.9                                |
| C <sub>11</sub> Cl <sub>10</sub> | 464.8                                | 462.8                                | C <sub>16</sub> Cl <sub>10</sub> | 534.9                                | 532.9                                |

|                                  |       |       |                                  |       |       |
|----------------------------------|-------|-------|----------------------------------|-------|-------|
| C <sub>12</sub> Cl <sub>5</sub>  | 307.0 | 305.0 | C <sub>17</sub> Cl <sub>5</sub>  | 377.1 | 375.1 |
| C <sub>12</sub> Cl <sub>6</sub>  | 341.0 | 343.0 | C <sub>17</sub> Cl <sub>6</sub>  | 411.1 | 413.1 |
| C <sub>12</sub> Cl <sub>7</sub>  | 375.0 | 377.0 | C <sub>17</sub> Cl <sub>7</sub>  | 445.0 | 447.0 |
| C <sub>12</sub> Cl <sub>8</sub>  | 408.9 | 410.9 | C <sub>17</sub> Cl <sub>8</sub>  | 479.0 | 481.0 |
| C <sub>12</sub> Cl <sub>9</sub>  | 444.9 | 442.9 | C <sub>17</sub> Cl <sub>9</sub>  | 515.0 | 513.0 |
| C <sub>12</sub> Cl <sub>10</sub> | 478.8 | 476.8 | C <sub>17</sub> Cl <sub>10</sub> | 548.9 | 546.9 |
| C <sub>13</sub> Cl <sub>5</sub>  | 321.1 | 319.1 |                                  |       |       |
| C <sub>13</sub> Cl <sub>6</sub>  | 355.0 | 357.0 |                                  |       |       |
| C <sub>13</sub> Cl <sub>7</sub>  | 389.0 | 391.0 |                                  |       |       |
| C <sub>13</sub> Cl <sub>8</sub>  | 422.9 | 424.9 |                                  |       |       |
| C <sub>13</sub> Cl <sub>9</sub>  | 458.9 | 456.9 |                                  |       |       |
| C <sub>13</sub> Cl <sub>10</sub> | 492.9 | 490.9 |                                  |       |       |

---

181

182

183

184

185

186

187

188 **Table S4 SCCPs of plant background (plants before exposure).**

| Plant species         | Tissues | C <sub>10</sub> Cl <sub>5</sub><br>(ng/g) | C <sub>10</sub> Cl <sub>6</sub><br>(ng/g) | C <sub>10</sub> Cl <sub>7</sub><br>(ng/g) | C <sub>10</sub> Cl <sub>8</sub><br>(ng/g) | C <sub>11</sub> Cl <sub>5</sub><br>(ng/g) | C <sub>11</sub> Cl <sub>6</sub><br>(ng/g) | C <sub>12</sub> Cl <sub>5</sub><br>(ng/g) | C <sub>12</sub> Cl <sub>6</sub><br>(ng/g) | C <sub>13</sub> Cl <sub>5</sub><br>(ng/g) | C <sub>13</sub> Cl <sub>6</sub><br>(ng/g) |
|-----------------------|---------|-------------------------------------------|-------------------------------------------|-------------------------------------------|-------------------------------------------|-------------------------------------------|-------------------------------------------|-------------------------------------------|-------------------------------------------|-------------------------------------------|-------------------------------------------|
| Background of pumpkin | Shoots  | 2790 ± 973 <sup>a</sup>                   | 1949 ± 476                                | 624 ± 343                                 | 434 ± 324                                 | 2260 ± 887                                | 1263 ± 234                                | 444 ± 199                                 | 121 ± 47                                  | 502 ± 259                                 | 126 ± 58                                  |
|                       | Stems   | 3218 ± 188                                | 962 ± 242                                 | 248 ± 77                                  | 154 ± 47                                  | 3129 ± 349                                | 805 ± 219                                 | 2756 ± 358                                | 404 ± 118                                 | 2709 ± 463                                | 421 ± 113                                 |
|                       | Roots   | 4465 ± 1518                               | 2038 ± 247                                | 494 ± 38                                  | 239 ± 97                                  | 4329 ± 215                                | 1694 ± 145                                | 2895 ± 156                                | 548 ± 34                                  | 2206 ± 39                                 | 546 ± 86                                  |
| Background of soybean | Shoots  | 1492 ± 1227                               | 1068 ± 976                                | 438 ± 145                                 | 297 ± 112                                 | 2469 ± 562                                | 1382 ± 333                                | 1683 ± 289                                | 160 ± 21                                  | 3093 ± 280                                | 182 ± 103                                 |
|                       | Stems   | 4773 ± 327                                | 469 ± 43                                  | 194 ± 51                                  | 102 ± 86                                  | 5871 ± 388                                | 570 ± 89                                  | 13621 ± 1889                              | 237 ± 13                                  | 36787 ± 3336                              | 265 ± 43                                  |
|                       | Roots   | 8222 ± 614                                | 322 ± 146                                 | 258 ± 117                                 | 61.8 ± 29.3                               | 2655 ± 391                                | 379 ± 128                                 | 5902 ± 761                                | 482 ± 156                                 | 9747 ± 4084                               | 398 ± 205                                 |

189 <sup>a</sup>Mean value ± standard deviation (n=3). No SCCPs detected in the cultivation solution for plant backgrounds.

190

191

192 **Table S5 Concentrations of daughter SCCPs in shoots, stems and roots of exposed pumpkins and soybeans.**

| Groups                         | Samples | C <sub>10</sub> Cl <sub>5</sub> | C <sub>10</sub> Cl <sub>6</sub> | C <sub>10</sub> Cl <sub>7</sub> | C <sub>10</sub> Cl <sub>8</sub> | C <sub>11</sub> Cl <sub>5</sub> | C <sub>11</sub> Cl <sub>6</sub> | C <sub>12</sub> Cl <sub>5</sub> | C <sub>12</sub> Cl <sub>6</sub> | C <sub>13</sub> Cl <sub>5</sub> | C <sub>13</sub> Cl <sub>6</sub> |
|--------------------------------|---------|---------------------------------|---------------------------------|---------------------------------|---------------------------------|---------------------------------|---------------------------------|---------------------------------|---------------------------------|---------------------------------|---------------------------------|
|                                |         | (ng/g)                          |
| Exposed<br>pumpkin<br>(1 day)  | Shoots  | n.d. <sup>a</sup>               | n.d.                            | 456 ±                           | 214 ±                           | 1139 ±                          | 692 ±                           | 251 ±                           | 83.0 ±                          | n.d.                            | 82.2 ±                          |
|                                |         |                                 |                                 | 424 <sup>b</sup>                | 178                             | 921                             | 503                             | 211                             | 65.6                            |                                 | 37.2                            |
|                                | Stems   | n.d.                            | 784 ±                           | 255 ±                           | 46.7 ±                          | n.d.                            | 478 ±                           | n.d.                            | n.d.                            | n.d.                            | n.d.                            |
|                                |         |                                 |                                 | 670                             | 206                             | 56.2                            | 372                             |                                 |                                 |                                 |                                 |
|                                | Roots   | n.d.                            | 894 ±                           | 557 ±                           | 62.7 ±                          | n.d.                            | 592 ±                           | n.d.                            | n.d.                            | n.d.                            | n.d.                            |
|                                |         |                                 |                                 | 379                             | 199                             | 61.2                            | 458                             |                                 |                                 |                                 |                                 |
| Exposed<br>pumpkin<br>(2 days) | Shoots  | n.d.                            | 3891 ±                          | 1437 ±                          | 426 ±                           | 699 ±                           | 668 ±                           | 417 ±                           | 144 ±                           | n.d.                            | 131 ±                           |
|                                |         |                                 | 2653                            | 672                             | 256                             | 1067                            | 701                             | 268                             | 95                              |                                 | 79                              |
|                                | Stems   | n.d.                            | 358 ±                           | 210 ±                           | 49.9 ±                          | n.d.                            | 171 ±                           | n.d.                            | n.d.                            | n.d.                            | n.d.                            |
|                                |         |                                 | 289                             | 121                             | 37.4                            | 174                             |                                 |                                 |                                 |                                 |                                 |
|                                | Roots   | n.d.                            | 558 ±                           | 424 ±                           | 99.4 ±                          | n.d.                            | 400 ±                           | n.d.                            | n.d.                            | n.d.                            | n.d.                            |
|                                |         |                                 |                                 | 409                             | 109                             | 101                             | 217                             |                                 |                                 |                                 |                                 |

|                                |        |        |        |        |        |         |        |         |        |         |        |
|--------------------------------|--------|--------|--------|--------|--------|---------|--------|---------|--------|---------|--------|
| Exposed<br>pumpkin<br>(4 days) | Shoots | 1735 ± | 6856 ± | 3188 ± | 1296 ± | n.d.    | 698 ±  | 1053 ±  | 297 ±  | 301 ±   | 299 ±  |
|                                |        | 2262   | 5541   | 1978   | 838    |         | 844    | 772     | 212    | 302     | 210    |
|                                | Stems  | n.d.   | 2074 ± | 818 ±  | 319 ±  | n.d.    | 1076 ± | n.d.    | 712 ±  | n.d.    | 570 ±  |
|                                |        |        | 2757   | 935    | 320    |         | 1149   |         | 1310   |         | 1135   |
|                                | Roots  | n.d.   | 959 ±  | 566 ±  | 192 ±  | 564 ±   | 1174 ± | 1475 ±  | 254 ±  | 727 ±   | 225 ±  |
|                                |        |        | 565    | 134    | 84     | 429     | 1294   | 685     | 166    | 430     | 140    |
| Exposed<br>pumpkin<br>(6 days) | Shoots | n.d.   | n.d.   | 954 ±  | 524 ±  | n.d.    | n.d.   | 811 ±   | 86.3 ± | 863 ±   | 83.9 ± |
|                                |        |        |        | 301    | 133    |         |        | 239     | 23.0   | 305     | 30.0   |
|                                | Stems  | 6096 ± | 232 ±  | 223 ±  | 61.3 ± | 5550 ±  | 71.6 ± | 4666 ±  | 304 ±  | 10720 ± | 345 ±  |
|                                |        | 6112   | 59     | 136    | 29.9   | 6186    | 84.0   | 2381    | 63     | 13972   | 264    |
|                                | Roots  | 6779 ± | n.d.   | 81.8 ± | 138 ±  | 18930 ± | n.d.   | 21244 ± | 792 ±  | 16733 ± | 520 ±  |
|                                |        | 6407   |        | 47.4   | 65     | 6146    |        | 8484    | 215    | 8868    | 225    |
| Exposed                        | Shoots | n.d.   | 686 ±  | 820 ±  | 102 ±  | n.d.    | n.d.   | 490 ±   | 57.5 ± | 139 ±   | 34.0 ± |

|           |        |         |        |        |        |         |        |        |        |         |       |
|-----------|--------|---------|--------|--------|--------|---------|--------|--------|--------|---------|-------|
| pumpkin   |        |         | 718    | 128    | 76     |         |        | 140    | 22.9   | 96      | 9.8   |
| (10 days) | Stems  | 1124 ±  | 1840 ± | 1235 ± | 623 ±  | n.d.    | n.d.   | 910 ±  | 871 ±  | 2276 ±  | 449 ± |
|           |        | 1225    | 2144   | 1233   | 814    |         |        | 1034   | 1706   | 1810    | 903   |
|           | Roots  | n.d.    | n.d.   | n.d.   | n.d.   | n.d.    | n.d.   | 907 ±  | n.d.   | 1967 ±  | n.d.  |
|           |        |         |        |        |        |         |        | 1245   |        | 2397    |       |
| Exposed   | Shoots | n.d.    | n.d.   | 1404 ± | 1006 ± | n.d.    | n.d.   | 2369 ± | 141 ±  | 2382 ±  | 145 ± |
| soybean   |        |         |        | 130    | 78     |         |        | 603    | 55     | 1507    | 98    |
| (10 days) | Stems  | 13846 ± | 1344 ± | 1316 ± | 612 ±  | 12630 ± | 2020 ± | 7178 ± | 1162 ± | 41292 ± | 937 ± |
|           |        | 11810   | 1478   | 1040   | 903    | 6924    | 4343   | 8848   | 1923   | 32220   | 883   |
|           | Roots  | 1727 ±  | 844 ±  | 54.0 ± | 256 ±  | 8530 ±  | 552 ±  | 2463 ± | 549 ±  | 8291 ±  | 235 ± |
|           |        | 1124    | 64     | 30.6   | 34     | 3627    | 315    | 3155   | 228    | 5378    | 65    |

193

194 <sup>a</sup> Non- detectable. <sup>b</sup> Mean value ± standard deviation (n = 5).

195

196

197 **Table S6 Concentrations of daughter SCCPs in shoots, stems and roots of planted blank controls of pumpkin (PBCP) and soybean (PBCS).**

| Groups           | Samples | C <sub>10</sub> Cl <sub>5</sub> | C <sub>10</sub> Cl <sub>6</sub> | C <sub>10</sub> Cl <sub>7</sub> | C <sub>10</sub> Cl <sub>8</sub> | C <sub>11</sub> Cl <sub>5</sub> | C <sub>11</sub> Cl <sub>6</sub> | C <sub>12</sub> Cl <sub>5</sub> | C <sub>12</sub> Cl <sub>6</sub> | C <sub>13</sub> Cl <sub>5</sub> | C <sub>13</sub> Cl <sub>6</sub> |
|------------------|---------|---------------------------------|---------------------------------|---------------------------------|---------------------------------|---------------------------------|---------------------------------|---------------------------------|---------------------------------|---------------------------------|---------------------------------|
|                  |         | (ng/g)                          |
| PBCP<br>(1 day)  | Shoots  | n.d. <sup>a</sup>               | n.d.                            | 300 ±                           | 53.9 ±                          | 245 ±                           | 106 ± 94                        | 91.0 ±                          | 27.2 ±                          | n.d.                            | 13.9 ±                          |
|                  |         |                                 |                                 | 40 <sup>b</sup>                 | 25.9                            | 166                             |                                 | 65.8                            | 7.7                             |                                 | 2.3                             |
|                  | Stems   | n.d.                            | 440 ±                           | 182 ±                           | 76.1 ±                          | n.d.                            | 246 ±                           | n.d.                            | n.d.                            | n.d.                            | n.d.                            |
|                  |         |                                 | 527                             | 141                             | 44.0                            |                                 | 245                             |                                 |                                 |                                 |                                 |
|                  | Roots   | n.d.                            | 878 ±                           | 330 ±                           | 74.5 ±                          | n.d.                            | 706 ±                           | n.d.                            | n.d.                            | n.d.                            | n.d.                            |
|                  |         |                                 | 785                             | 195                             | 33.5                            |                                 | 583                             |                                 |                                 |                                 |                                 |
| PBCP<br>(2 days) | Shoots  | n.d.                            | 2753 ±                          | 1071 ±                          | 283 ±                           | 599 ±                           | 678 ±                           | 353 ±                           | 167 ±                           | n.d.                            | 117 ±                           |
|                  |         |                                 | 549                             | 108                             | 5                               | 35                              | 77                              | 30                              | 92                              |                                 | 32                              |
|                  | Stems   | n.d.                            | 601 ±                           | 245 ± 41                        | 78.1 ±                          | n.d.                            | 153 ± 11                        | n.d.                            | n.d.                            | n.d.                            | n.d.                            |
|                  |         |                                 | 115                             |                                 | 3.7                             |                                 |                                 |                                 |                                 |                                 |                                 |
|                  | Roots   | n.d.                            | 826 ±                           | 387 ±                           | 89.5 ±                          | n.d.                            | 538 ±                           | n.d.                            | n.d.                            | n.d.                            | n.d.                            |
|                  |         |                                 | 824                             | 296                             | 78.5                            |                                 | 455                             |                                 |                                 |                                 |                                 |



|                  |        |        |        |        |        |        |       |        |       |         |        |
|------------------|--------|--------|--------|--------|--------|--------|-------|--------|-------|---------|--------|
| PBCP<br>(4 days) | Shoots | n.d.   | 4726 ± | 2180 ± | 693 ±  | n.d.   | 215 ± | 564 ±  | 179 ± | n.d.    | 166 ±  |
|                  |        |        | 865    | 206    | 80     |        | 153   | 128    | 24    |         | 27     |
|                  | Stems  | n.d.   | n.d.   | 54.9 ± | 31.9 ± | n.d.   | n.d.  | n.d.   | n.d.  | n.d.    | n.d.   |
|                  |        |        |        | 7.2    | 39.7   |        |       |        |       |         |        |
|                  | Roots  | n.d.   | n.d.   | 165 ±  | 79.5 ± | n.d.   | n.d.  | n.d.   | n.d.  | n.d.    | n.d.   |
|                  |        |        |        | 270    | 106    |        |       |        |       |         |        |
| PBCP<br>(6 days) | Shoots | n.d.   | n.d.   | 912 ±  | 589 ±  | n.d.   | n.d.  | 2207 ± | 174 ± | 449     | 148 ±  |
|                  |        |        |        | 665    | 473    |        |       | 864    | 122   | ±604    | 107    |
|                  | Stems  | n.d.   | n.d.   | n.d.   | n.d.   | 2146 ± | n.d.  | 6490 ± | 113 ± | 13353 ± | 116 ±  |
|                  |        |        |        |        |        | 2397   |       | 7484   | 120   | 14185   | 174    |
|                  | Roots  | 1193 ± | n.d.   | n.d.   | n.d.   | 875 ±  | n.d.  | 9771 ± | 391 ± | 3817 ±  | 47.7 ± |
|                  |        | 1030   |        |        |        | 508    |       | 9301   | 330   | 2652    | 30.7   |
| PBCP             | Shoots | n.d.   | n.d.   | n.d.   | n.d.   | n.d.   | n.d.  | 460 ±  | n.d.  | 443 ±   | n.d.   |

|           |        |         |       |        |        |        |       |        |        |       |       |
|-----------|--------|---------|-------|--------|--------|--------|-------|--------|--------|-------|-------|
| (10 days) |        |         |       |        |        |        |       | 565    |        | 541   |       |
|           | Stems  | 3002 ±  | 455 ± | 145 ±  | 65.8 ± | 1163 ± | n.d.  | 3145 ± | 92.9 ± | 441 ± | 254 ± |
|           |        | 3090    | 629   | 120    | 8.2    | 1560   |       | 3207   | 85.0   | 539   | 327   |
|           | Roots  | n.d.    | n.d.  | n.d.   | n.d.   | n.d.   | n.d.  | 921 ±  | n.d.   | 287 ± | n.d.  |
|           |        |         |       |        |        |        |       | 420    |        | 66    |       |
| PBCS      | Shoots | 1945 ±  | n.d.  | 2291 ± | 1345 ± | 2711 ± | n.d.  | 2893 ± | 177 ±  | n.d.  | 224 ± |
| (10 days) |        | 138     |       | 2548   | 1490   | 1847   |       | 1930   | 150    |       | 320   |
|           | Stems  | 64171 ± | 707 ± | 2378 ± | 271 ±  | 8745 ± | 803 ± | n.d.   | 1018 ± | n.d.  | 596 ± |
|           |        | 56413   | 284   | 1778   | 51     | 8417   | 1243  |        | 851    |       | 392   |
|           | Roots  | n.d.    | 176   | 808 ±  | 108 ±  | 4824 ± | 379 ± | 2042 ± | n.d.   | n.d.  | 146 ± |
|           |        |         | ±168  | 1010   | 30     | 4166   | 515   | 3079   |        |       | 125   |

198

199 <sup>a</sup> Non-detectable. <sup>b</sup> Mean value ± standard deviation (n = 3).

200

201

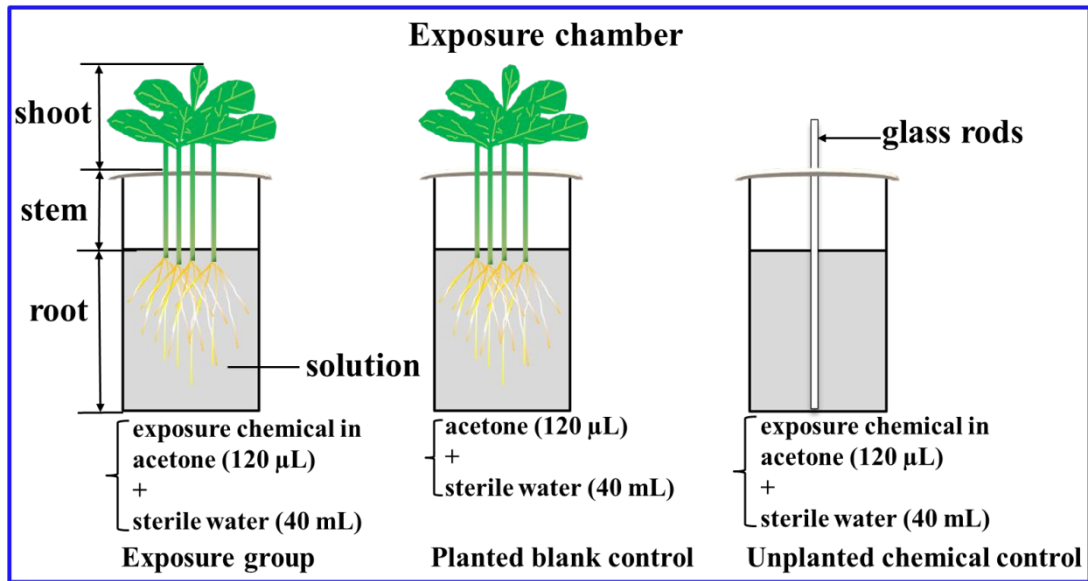

202

203 **Figure S1** Schematic of the hydroponic exposure experiments and sampling. Bottles were

204 wrapped with aluminum foil. Pumpkins and soybeans were separately exposed to parent SCCPs.

205

206

207

208

209

210

211

212

213

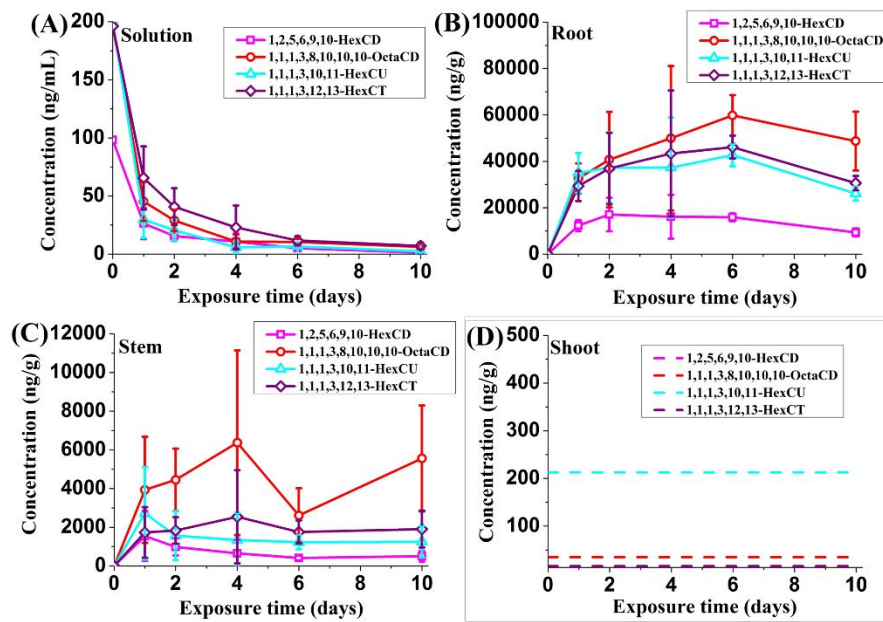

214

215

216 **Figure S2** Concentrations of parent SCCPs in the solutions (A), roots (B), stems (C), and shoots

217 (D) when pumpkin plants were exposed to SCCPs over time. No parent SCCPs were detected

218 in the shoots (lower than the method detection limits (MDLs) as the dashed lines show).

219

220

221

222

223

224

225

226

227

228

229

230

231

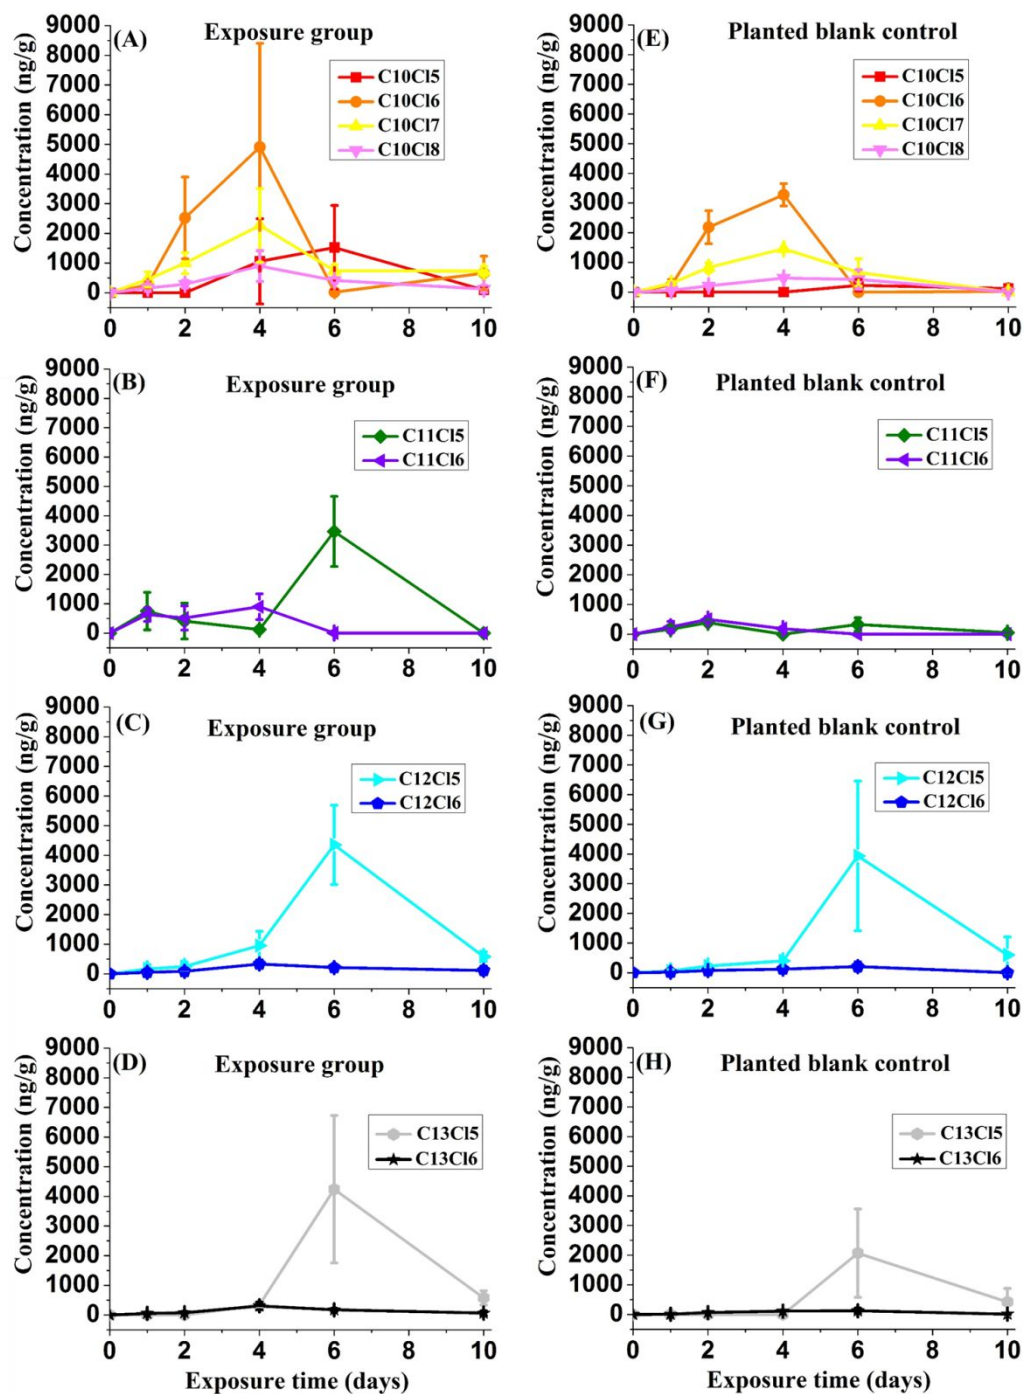

232

233 **Figure S3** Concentrations of daughter SCCP congeners in exposure groups (A-D) and planted

234 blank controls (E-H) of pumpkin seedlings over time. No C<sub>9</sub> daughter congeners were detected

235 in plants tissues and solutions of exposure groups and planted blank controls.

236

237

238

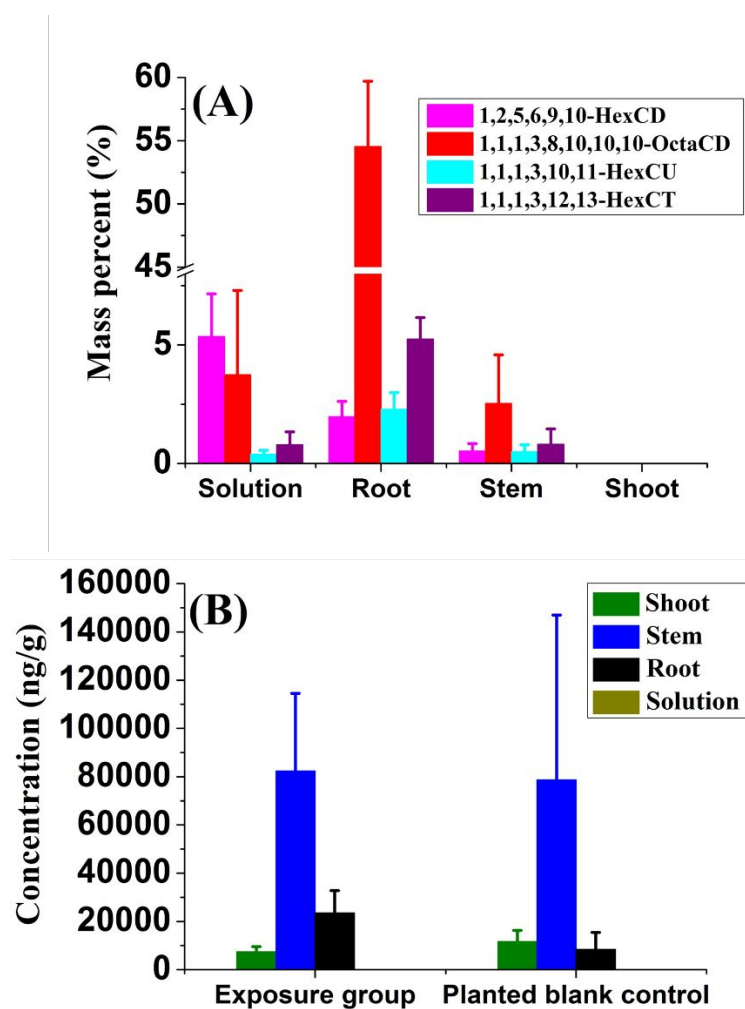

240

241 **Figure S4** Mass percent of individual parent SCCPs (A) and concentrations of total daughter  
 242 SCCPs (B) in different compartments of soybeans after 10 days exposure. No parent SCCPs  
 243 were found in the shoots of the exposure group, and no daughter SCCPs were found in solution  
 244 of the exposure group or the planted blank control.

245

246

247

248

249

250

251

252

253 **References**

- 254 1. Li, Y. L.; Hou, X. W.; Yu, M.; Zhou, Q. F.; Liu, J. Y.; Schnoor, J. L.; Jiang, G. B.  
255 Dechlorination and chlorine rearrangement of 1,2,5,5,6,9,10-heptachlorodecane mediated  
256 by the whole pumpkin seedlings. *Environ. Pollut.* **2017**, *224*, 524-531.
- 257 2. Zeng, L. X.; Wang, T.; Han, W. Y.; Yuan, B.; Liu, Q.; Wang, Y. W.; Jiang, G. B. Spatial  
258 and Vertical Distribution of Short Chain Chlorinated Paraffins in Soils from Wastewater  
259 Irrigated Farmlands. *Environ. Sci. Technol.* **2011**, *45* (6), 2100-2106.

260
